# Supplementary material for: Sulfonate-ended carbosilane dendrimers with a flexible scaffold cause inactivation of HIV-1 virions and gp120 shedding
Source: Royal Society of Chemistry journal article supplement (doi:10.1039/c8nr01664j), 2018-01-01
Supplement: c8nr01664j1.pdf [file c8nr01664j1.pdf]

**SUPPLEMENTARY INFORMATION**

**Sulfonate-ended carbosilane dendrimers with a flexible scaffold cause  
inactivation of HIV-1 virions and gp120 shedding**

Daniel Sepúlveda-Crespo<sup>a,b,c,d</sup>, Francisco J. de la Mata<sup>d,e</sup>, Rafael Gómez<sup>d,e</sup>, and M<sup>a</sup> A.  
Muñoz-Fernández<sup>\*a,b,c,d</sup>

<sup>a</sup> Sección Inmunología, Laboratorio InmunoBiología Molecular, Hospital General Universitario Gregorio Marañón, Madrid 28007, Spain.

<sup>b</sup> Instituto de Investigación Sanitaria Gregorio Marañón (IiSGM), Madrid 28007, Spain.

<sup>c</sup> Spanish HIV HGM Biobank, Madrid 28007, Spain.

<sup>d</sup> Networking Research Center on Bioengineering, Biomaterials and Nanomedicine (CIBER-BBN), Madrid 28029, Spain

<sup>e</sup> Departamento de Química Inorgánica, Universidad de Alcalá, Campus Universitario, Alcalá de Henares 28805 Madrid, Spain.

\* Corresponding author

M<sup>a</sup> Ángeles Muñoz-Fernández

Immunology Section. Laboratorio InmunoBiología Molecular

Hospital General Universitario Gregorio Marañón.

Spanish HIV HGM Biobank. IiSGM. CIBER-BBN.

C/Dr. Esquerdo 46, 28007 Madrid, Spain. Telephone: 915 868 565

e-mail: [mmunoz.hgugm@gmail.com](mailto:mmunoz.hgugm@gmail.com) and [mmunoz.hgugm@salud.madrid.org](mailto:mmunoz.hgugm@salud.madrid.org)

**Supplementary Table 1** Chemical and structural characteristics of polyanionic carbosilane dendrimers with a polyphenolic core

| <b>Dendrimer</b> | <b>Molecular Formula</b>                                                                                             | <b>Mw (g/mol)<sup>a</sup></b> | <b>G<sup>b</sup></b> | <b>SG<sup>c</sup></b> | <b>NSG<sup>d</sup></b> |
|------------------|----------------------------------------------------------------------------------------------------------------------|-------------------------------|----------------------|-----------------------|------------------------|
| <b>G1-S12P</b>   | C <sub>93</sub> H <sub>192</sub> N <sub>6</sub> Na <sub>12</sub> O <sub>39</sub> S <sub>12</sub> Si <sub>9</sub>     | 2,932.0                       | 1                    | Sulfonate             | 12                     |
| <b>G2-S24P</b>   | C <sub>189</sub> H <sub>402</sub> N <sub>12</sub> Na <sub>24</sub> O <sub>75</sub> S <sub>24</sub> Si <sub>21</sub>  | 5,954.4                       | 2                    | Sulfonate             | 24                     |
| <b>G3-S48P</b>   | C <sub>381</sub> H <sub>822</sub> N <sub>24</sub> Na <sub>48</sub> O <sub>147</sub> S <sub>48</sub> Si <sub>45</sub> | 11,999.2                      | 3                    | Sulfonate             | 48                     |
| <b>G1-C12P</b>   | C <sub>105</sub> H <sub>192</sub> N <sub>6</sub> Na <sub>12</sub> O <sub>27</sub> Si <sub>9</sub>                    | 2,499.3                       | 1                    | Carboxylate           | 12                     |
| <b>G2-C24P</b>   | C <sub>213</sub> H <sub>402</sub> N <sub>12</sub> Na <sub>24</sub> O <sub>51</sub> Si <sub>21</sub>                  | 5,084.2                       | 2                    | Carboxylate           | 24                     |
| <b>G3-C48P</b>   | C <sub>431</sub> H <sub>826</sub> N <sub>24</sub> Na <sub>48</sub> O <sub>99</sub> Si <sub>45</sub>                  | 10,296.6                      | 3                    | Carboxylate           | 48                     |

<sup>a</sup> Mw: Molecular weight

<sup>b</sup> G: Number of generations according to the number of repeated layers with branching units from silicon atoms

<sup>c</sup> SG: Surface groups

<sup>d</sup> NSG: Number of surface groups

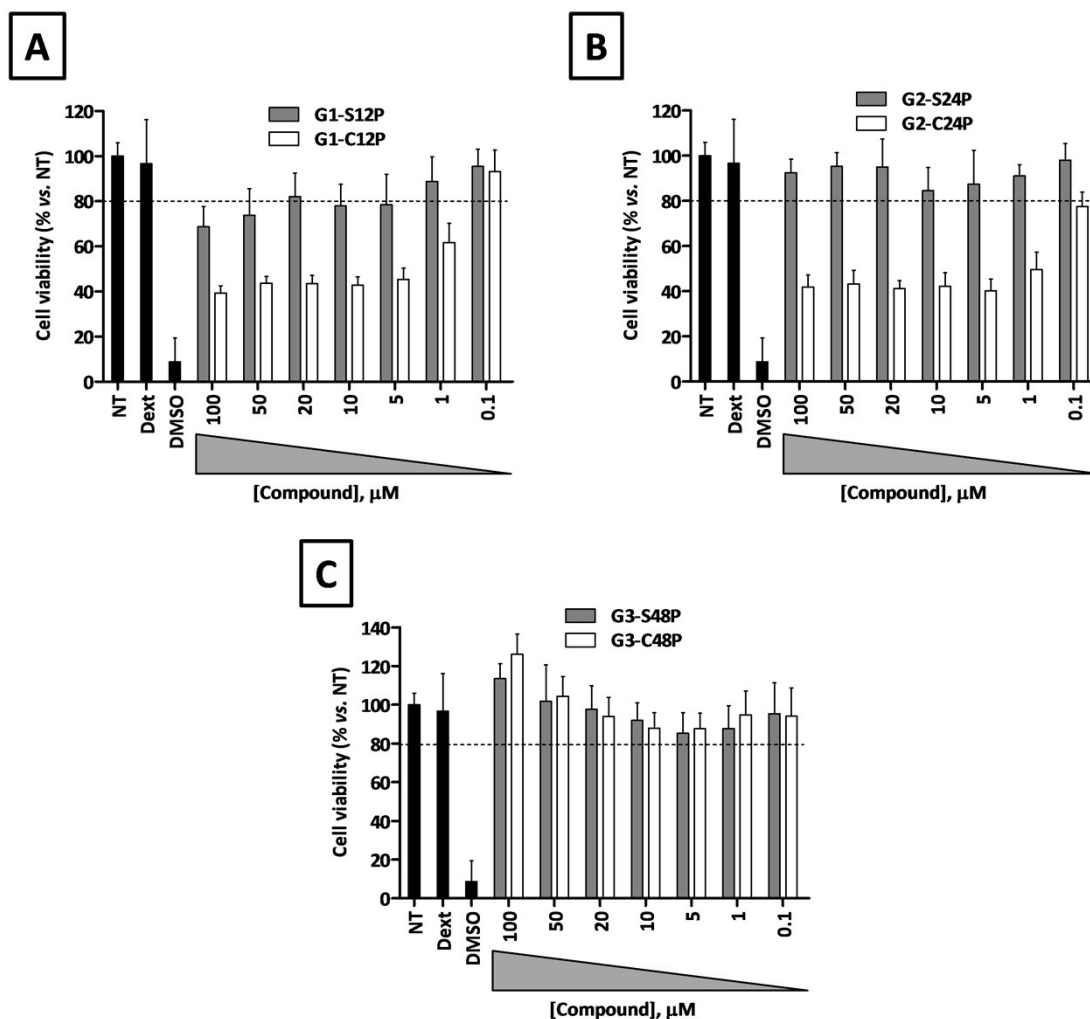

**Supplementary Figure 1** Cytotoxicity associated to polyanionic carboxylated dendrimers in TZM.b1 cells at 48 h post-loading using MTT assay. The cells were loaded with increased concentrations of dendrimers (ranged from 0.1 to 100  $\mu\text{M}$ ) from (A) first, (B) second or (C) third generation, or treated with 10  $\mu\text{M}$  dextran (innocuous control) or 10% of DMSO (control of cell death). The percent of cell viability was calculated as optical density of treated condition/non-treated control (NT)  $\times$  100. The 80% of viability was set as limit of toxicity. Data are represented as mean  $\pm$  SD of three experiments performed in triplicate. Abbreviations: Dext = dextran; DMSO = dimethyl sulfoxide.

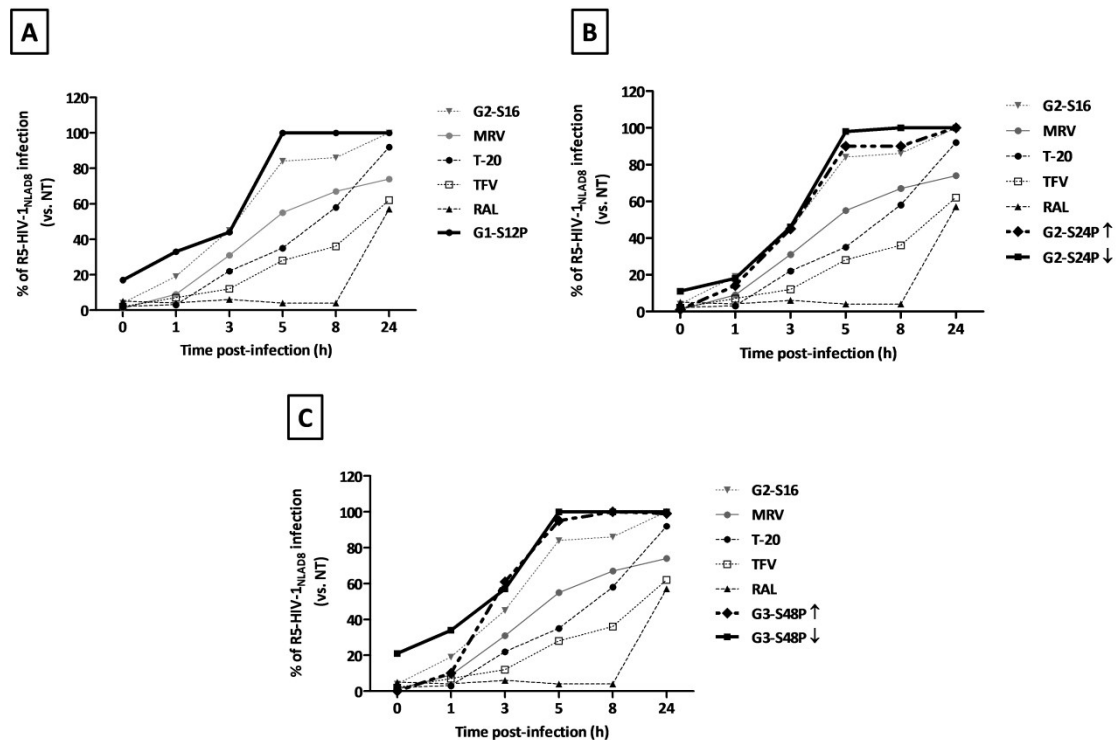

**Supplementary Figure 2** Time-of-drug-addition in the HIV-1 lifecycle of selected polyanionic carbosilane dendrimers. **(A)** G1-S12P (1  $\mu$ M), **(B)** G2-S24P at high (100  $\mu$ M,  $\uparrow$ ) and low (0.1  $\mu$ M,  $\downarrow$ ) concentrations, **(C)** G3-S48P at high (100  $\mu$ M,  $\uparrow$ ) and low (0.1  $\mu$ M,  $\downarrow$ ) concentrations, or G2-S16 (10  $\mu$ M), MRV (1  $\mu$ M), T-20 (20  $\mu$ M), TFV (1  $\mu$ M) or RAL (0.1  $\mu$ M) as controls were added upon R5-HIV-1<sub>NLAD8</sub> infection (20 ng p24/ $10^6$  cells) or at various points post-infection. Luciferase activity was measured at 48 h post-infection vs. non-treated control. Data represent the mean  $\pm$  SD of one experiment performed in duplicate. Abbreviations: MRV = maraviroc; RAL = raltegravir; T-20 = enfuvirtide; TFV = tenofovir.

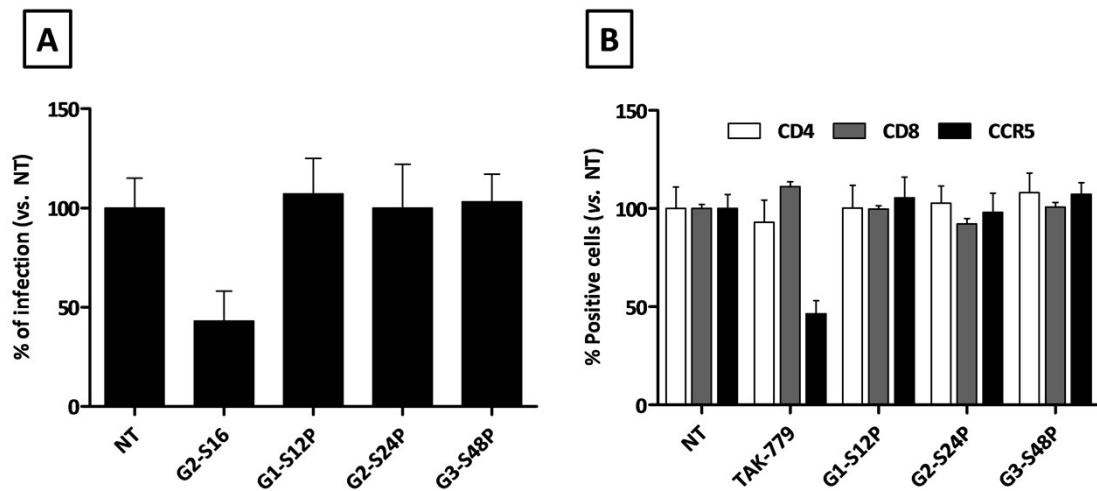

**Supplementary Figure 3** Cell-drug interactions and interaction of selected polyanionic carbosilane dendrimers with cellular surface markers. **(A)** TzM.bl cells were exposed to G1-S12P (1  $\mu$ M), G2-S24P (0.1  $\mu$ M) or G3-S48P (0.1  $\mu$ M), or G2-S16 (10  $\mu$ M) as a control for 1 h, extensively washed and infected with R5-HIV-1<sub>NLAD8</sub> (20 ng p24/10<sup>6</sup> cells). Luciferase activity was measured at 48 h post-infection vs. non-treated control (NT). **(B)** PHA-activated PBMCs were exposed to G1-S12P (1  $\mu$ M), G2-S24P or G3-S48P (0.1  $\mu$ M), or TAK-779 (0.1  $\mu$ M) as a CCR5 antagonist control for 24 h, and levels of CD4, CD8, and CCR5 at the cellular surface were followed by flow cytometry vs. NT. Data represent the mean  $\pm$  SD of three individual experiments performed in triplicate. Abbreviations: PBMCs = peripheral blood mononuclear cells; PHA = phytohemagglutinin.
